# Supplementary material for: Rapid electrochemical detection of l-lactate in Baijiu affecting serotonin and dopamine secretion in mice
Source: Royal Society of Chemistry journal article supplement (doi:10.1039/d4an00880d), 2024-01-01
Supplement: d4an00880d1.pdf [file d4an00880d1.pdf]

## Supporting Information

### Rapid Electrochemical Detection of L-lactate in Baijiu Affecting Serotonin and Dopamine Secretion in Mice

Yating Rui <sup>a</sup>, Qunyong Tang <sup>b</sup>, Liyi Chen <sup>b</sup>, Juan Pu <sup>c</sup>, Wanpeng Wang <sup>c</sup>, Shou-Nian Ding<sup>\*a</sup>

<sup>a</sup> Jiangsu Province Hi-Tech Key Laboratory for Bio-medical Research, School of Chemistry and Chemical Engineering, Southeast University, Nanjing 211189, China

<sup>b</sup> Jiangsu King's Lucky Brewery Joint-Stock Co., Ltd, Lian shui 223411, China

<sup>c</sup> Lian shui Peoples Hospital, Huaian, 223400, China

\* Corresponding author: [snding@seu.edu.cn](mailto:snding@seu.edu.cn)

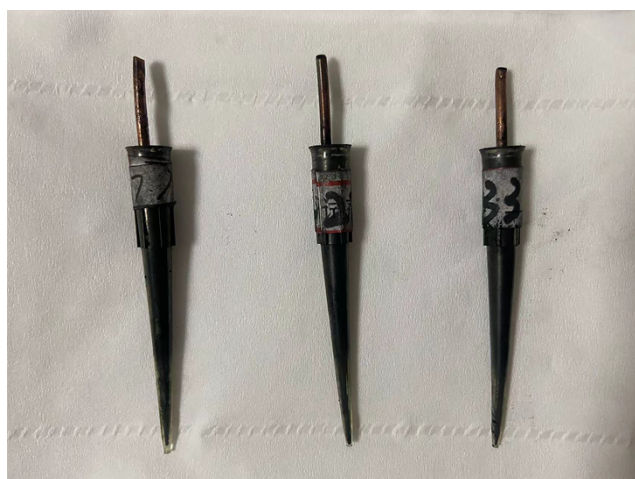

Fig. S1 Images taken by an iPhone of the prepared Au-CFEs.

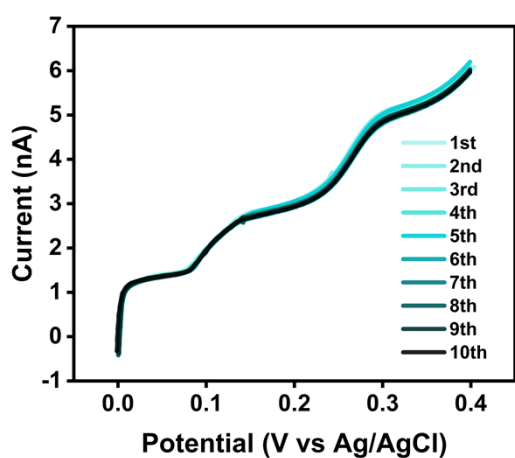

Fig. S2 Stability of Au-CFE towards 2.4 μM of 5-HT and DA (1:1 molar ratio) in 0.1 M PBS (pH = 7.4), the graph corresponds to their LSV response curves for continuous 10 times.

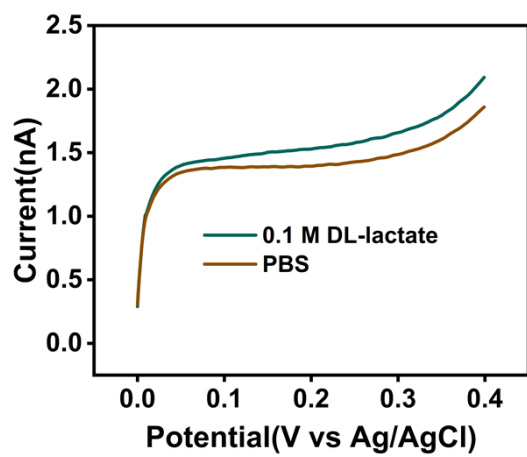

Fig. S3 Au-CFEs respond to LSV curves in PBS solution with and without lactate.
